# Supplementary material for: Multifunctional Zn(ii)/Cd(ii) metal complexes for tunable luminescence properties and highly efficient dye-sensitized solar cells
Source: Royal Society of Chemistry journal article supplement (doi:10.1039/c5ra07160g), 2015-01-01
Supplement: c5ra07160g1.pdf [file c5ra07160g1.pdf]

## Supporting Information

### **Multifunctional Zn(II)/Cd(II) Metal Complexes for Tunable Luminescence Properties and High Efficient Dye-Sensitized Solar Cells**

**Song Gao,<sup>a</sup> Rui Qing Fan,<sup>\*a</sup> Xin Ming Wang,<sup>a</sup> Liang Sheng Qiang,<sup>a</sup> Li Guo Wei,<sup>a</sup> Ping Wang,<sup>a</sup> Yu Lin Yang,<sup>\*a</sup> Yu Lei Wang,<sup>b</sup> Tian Zhu Luan<sup>c</sup>**

*<sup>a</sup> Department of Chemistry, Harbin Institute of Technology, Harbin 150001, P. R. China*

*<sup>b</sup> National Key Laboratory of Science and Technology on Tunable Laser, Harbin Institute of Technology, Harbin 150080, P. R. China*

*<sup>c</sup> The First Affiliated Hospital of Harbin Medical University, Harbin, 150001, P. R. China*

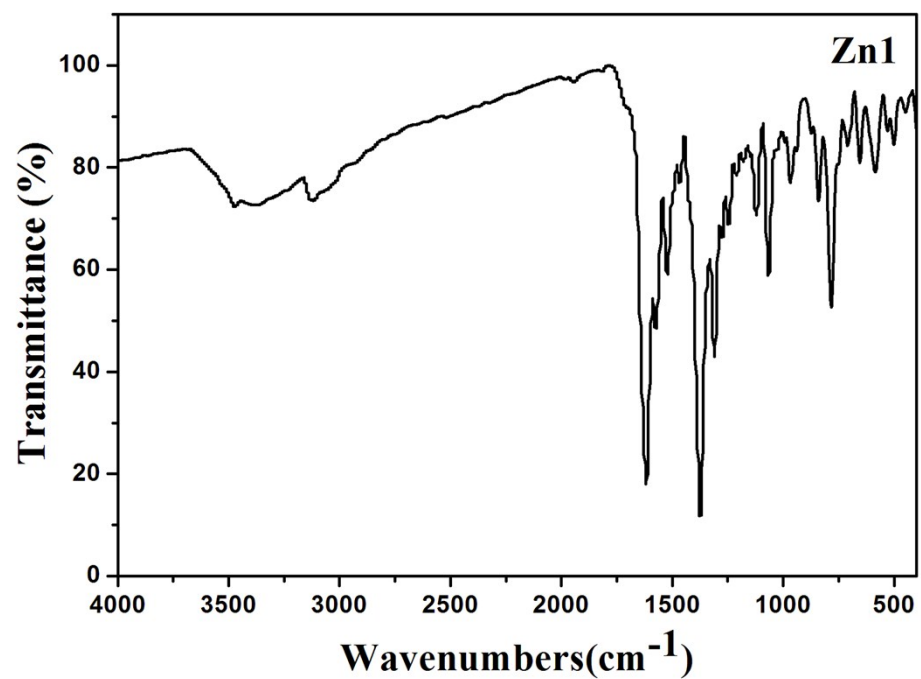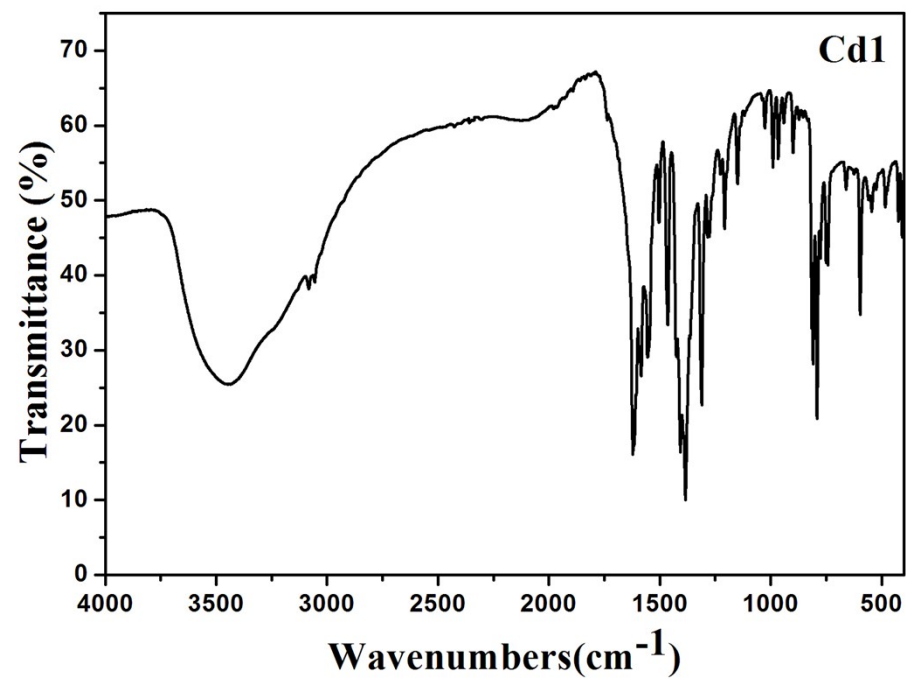

**Fig. S1** Infrared spectra of complexes **Zn1** and **Cd1** recorded from a KBr pellet.

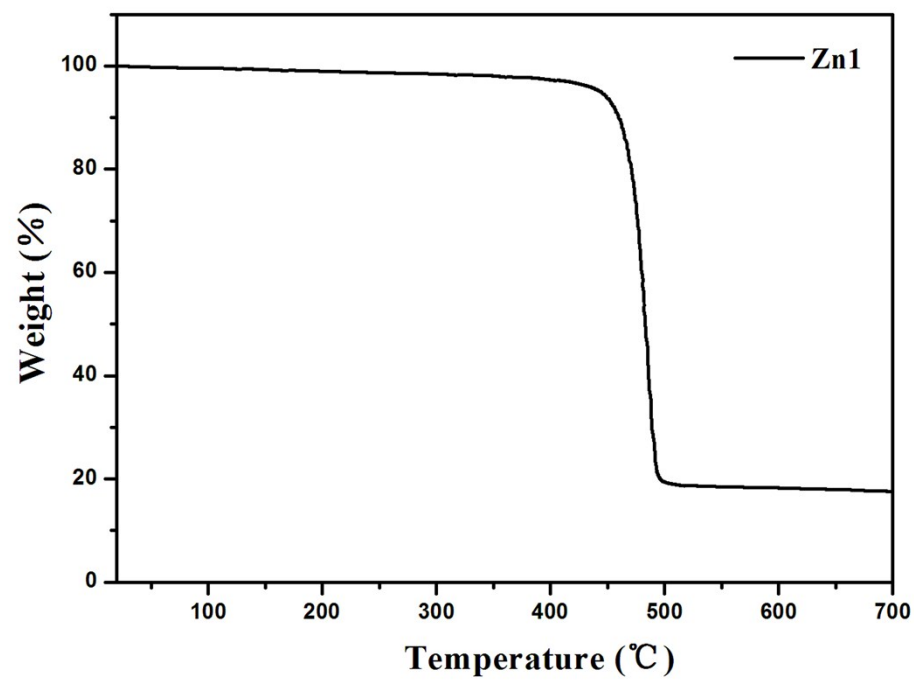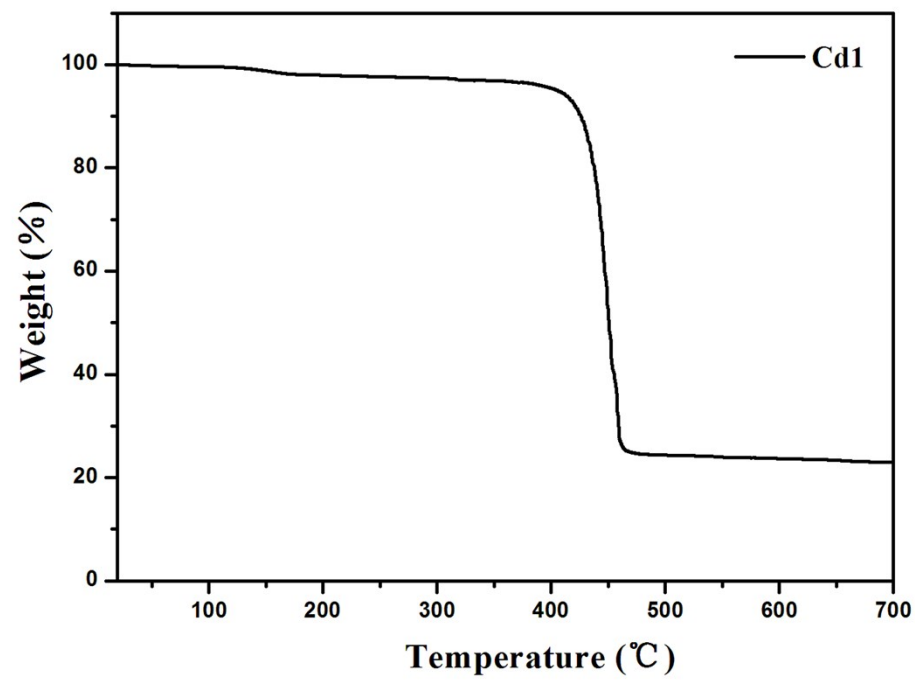

Fig. S2 The TGA curves of complexes **Zn1** and **Cd1**.

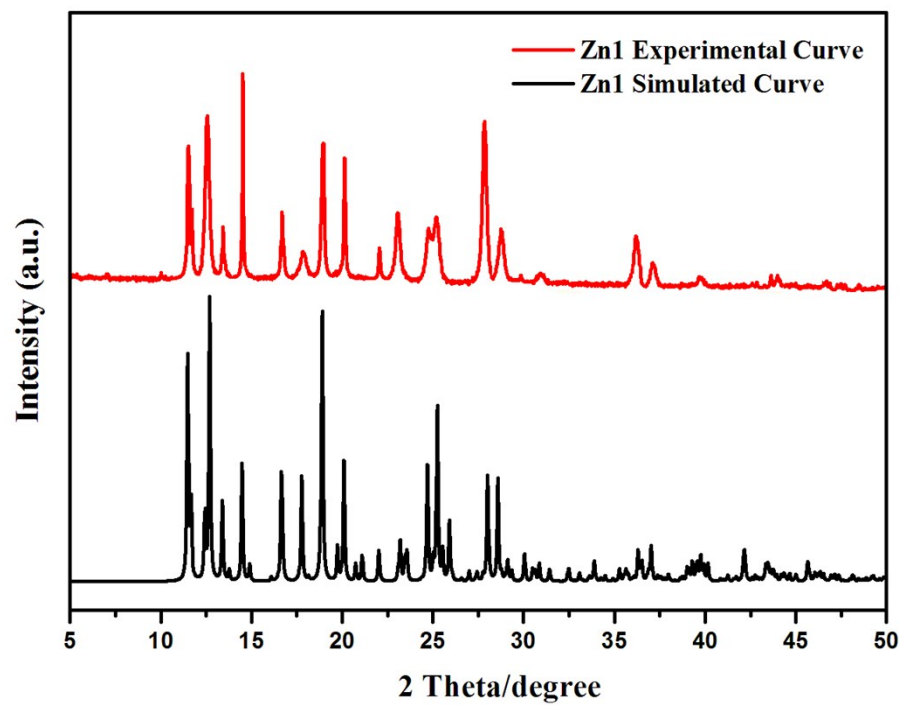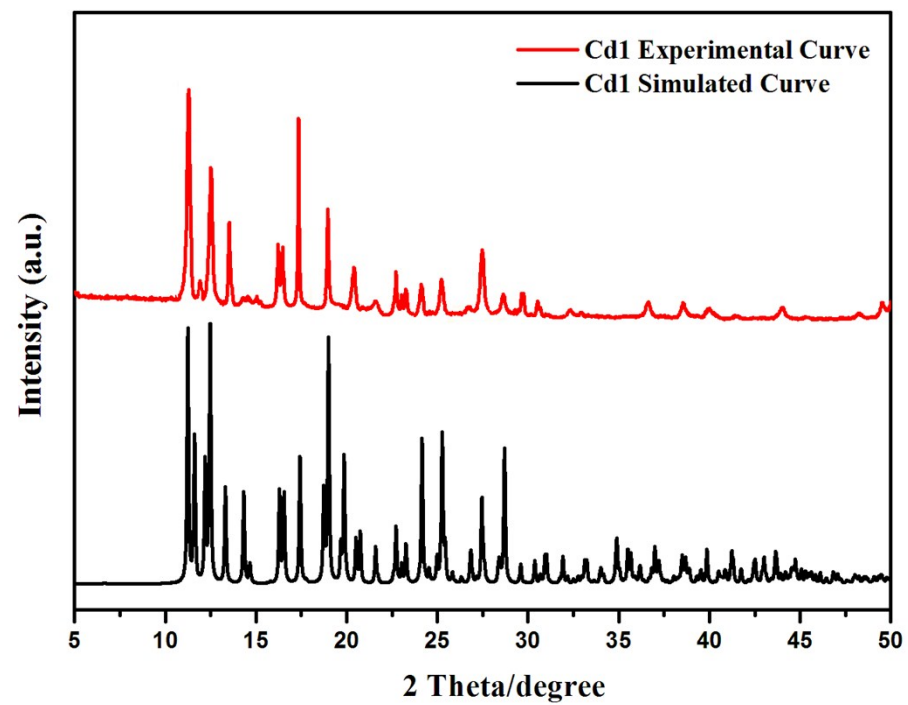

Fig. S3 The PXR contrast curves of complexes **Zn1** and **Cd1**.

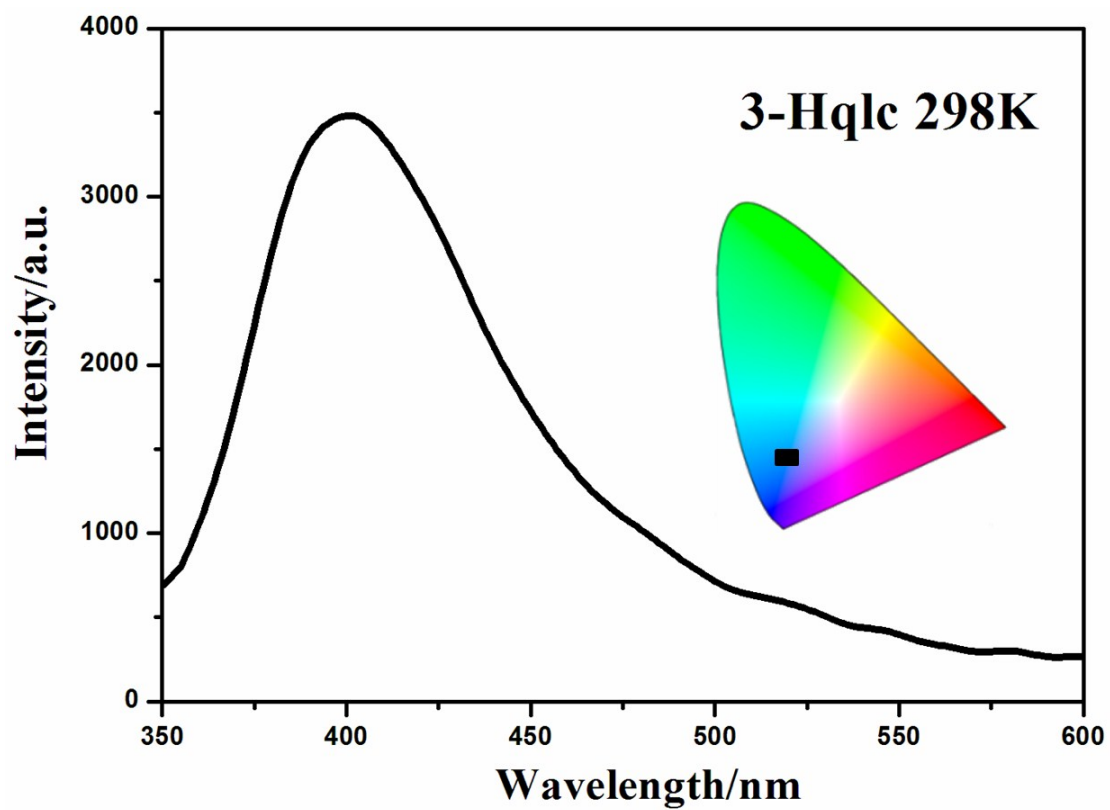

**Fig. S4** Emission spectra of ligand 3-Hqlc in the solid state at 298 K and the corresponding color coordinate diagram of emission.

**Table S1** Selected bond lengths (Å) and bond angles (°) for complexes **Zn1** and **Cd1**.

---

| <b>Zn1</b>        |           |                   |          |
|-------------------|-----------|-------------------|----------|
| Zn(1)-O(1)        | 1.968(3)  | Zn(1)-O(3)        | 1.927(2) |
| Zn(1)-N(1)        | 2.106(3)  | Zn(1)-N(2)        | 2.097(3) |
| O(3)-Zn(1)-O(1)   | 138.4(1)  | O(3)-Zn(1)-N(2)   | 110.2(1) |
| O(1)-Zn(1)-N(2)   | 100.8(1)  | O(3)-Zn(1)-N(1)   | 100.3(1) |
| O(1)-Zn(1)-N(1)   | 100.5(1)  | N(2)-Zn(1)-N(1)   | 100.9(1) |
| <b>Cd1</b>        |           |                   |          |
| Cd(1)-O(1)        | 2.276(2)  | Cd(1)-O(2)        | 2.164(2) |
| Cd(1)-O(4)#1      | 2.406(2)  | Cd(1)-O(3)        | 2.765(2) |
| Cd(1)-N(1)        | 2.332(2)  | Cd(1)-N(2)        | 2.348(2) |
| O(2)-Cd(1)-O(1)   | 158.9 (9) | O(2)-Cd(1)-O(4)#1 | 110.3(9) |
| O(1)-Cd(1)-O(4)#1 | 56.1(7)   | O(1)-Cd(1)-O(3)   | 110.1(1) |
| O(4)-Cd(1)-O(3)   | 93.2(9)   | N(2)-Cd(1)-O(3)   | 152.6(9) |
| N(1)-Cd(1)-O(4)#1 | 145.7(8)  | N(2)-Cd(1)-O(4)#1 | 96.5(8)  |
| N(1)-Cd(1)-N(2)   | 97.3(8)   |                   |          |

---

Symmetry transformations used to generate equivalent atoms: #1 x,-y,z+1/2.

**Table S2** Luminescence data for complexes **Zn1**, **Cd1** and 3-Hqlc ligand.

| Complexes  | Excitation<br>( $\lambda$ , nm) | Emission<br>( $\lambda_{\text{max}}$ , nm) | CIE (x, y) | Lifetime ( $\mu\text{s}$ ) |         |                            |         |                                        | Conditions <sup>a</sup>  |
|------------|---------------------------------|--------------------------------------------|------------|----------------------------|---------|----------------------------|---------|----------------------------------------|--------------------------|
|            |                                 |                                            |            | $\tau_1$ ( $\mu\text{s}$ ) | $A_1\%$ | $\tau_2$ ( $\mu\text{s}$ ) | $A_2\%$ | $\langle\tau\rangle$ ( $\mu\text{s}$ ) |                          |
| <b>Zn1</b> | 330                             | 424                                        | 0.19, 0.20 | —                          | —       | —                          | —       | —                                      | DMSO, 298K               |
|            | 330                             | 418                                        | 0.19, 0.19 | —                          | —       | —                          | —       | —                                      | CH <sub>3</sub> OH, 298K |
|            | 330                             | 412                                        | 0.20, 0.21 | —                          | —       | —                          | —       | —                                      | CHCl <sub>3</sub> , 298K |
|            | 330                             | 409                                        | 0.20, 0.20 | —                          | —       | —                          | —       | —                                      | THF, 298K                |
|            | 330                             | 468                                        | 0.24, 0.28 | 1.00                       | 52.36%  | 8.62                       | 47.64%  | 7.76                                   | Solid State, 298K        |
|            | 330                             | 483 <sup>sh</sup> , 510, 571 <sup>sh</sup> | 0.29, 0.42 | 1.30                       | 37.67%  | 11.41                      | 62.33%  | 10.76                                  | Solid State, 77K         |
| <b>Cd1</b> | 330                             | 418                                        | 0.19, 0.16 | —                          | —       | —                          | —       | —                                      | DMSO, 298K               |
|            | 330                             | 412                                        | 0.20, 0.13 | —                          | —       | —                          | —       | —                                      | CH <sub>3</sub> OH, 298K |
|            | 330                             | 407                                        | 0.20, 0.16 | —                          | —       | —                          | —       | —                                      | CHCl <sub>3</sub> , 298K |
|            | 330                             | 405                                        | 0.18, 0.14 | —                          | —       | —                          | —       | —                                      | THF, 298K                |
|            | 330                             | 450                                        | 0.23, 0.25 | 1.06                       | 65.46%  | 8.95                       | 34.54%  | 7.50                                   | Solid State, 298K        |
|            | 330                             | 449 <sup>sh</sup> , 485, 542 <sup>sh</sup> | 0.25, 0.33 | 1.50                       | 45.14%  | 10.87                      | 54.86%  | 9.91                                   | Solid State, 77K         |
| 3-Hqlc     | 330                             | 400                                        | 0.18, 0.15 | —                          | —       | —                          | —       | —                                      | Solid State, 298K        |

<sup>a</sup> Concentration in DMSO, CH<sub>3</sub>OH, CHCl<sub>3</sub> and THF solutions: (M) =  $1 \times 10^{-5}$  M.
